# Supplementary material for: Structure-based design, synthesis, and profiling of a β-tryptase inhibitor with a spiro-piperidineamide scaffold, benzylamine P1 group, and a substituted indole P4 group
Source: Royal Society of Chemistry journal article supplement (doi:10.1039/c1md00104c), 2011-01-01

# Structure-based design, synthesis, and profiling of a $\beta$ -tryptase inhibitor with a spiro-piperidineamide scaffold, benzylamine P1 group, and a substituted indole P4 group

## (Supplementary information)

Guyan Liang<sup>a1</sup>, Yong Mi Choi-Sledeski<sup>b</sup>, Gregory B. Poli<sup>b</sup>, Xin Chen<sup>c</sup>, Anne Minnich<sup>d</sup>, Qingping Wang<sup>e</sup>, Joseph Tsay<sup>d</sup>, Keith Sides<sup>d</sup>, Roy J. Vaz<sup>a</sup>

<sup>a</sup> Drug Design, Lead Generation and Candidate Realization; <sup>b</sup> Molecular Therapeutics, Lead Generation and Candidate Realization; <sup>c</sup> Structural Biology, Lead Generation and Candidate Realization; <sup>d</sup> In Vitro Pharmacology, Internal Medicine; <sup>e</sup> Drug Metabolism and Pharmacokinetics, Sanofi-Aventis Pharmaceuticals, Route 202-206, Bridgewater, NJ 08807, USA

1-(7-Fluoro-1-(2-methoxy-ethyl)-indole-3-yl)-carbonyl-5'-aminomethyl-spiro[piperidine-4,3'-(2H)-benzo[b]furan] hydrochloride

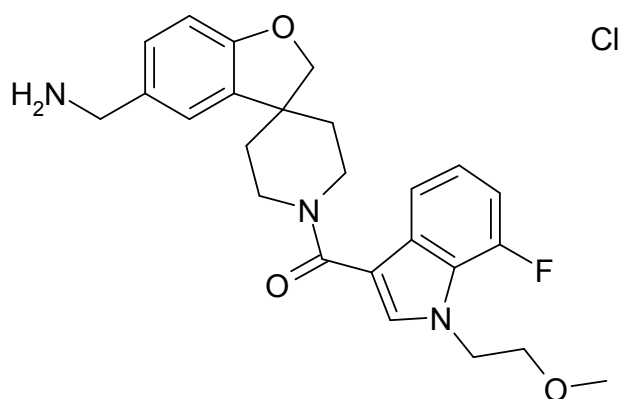

### A. 3-Bromo-4-hydroxybenzylamine hydrobromide

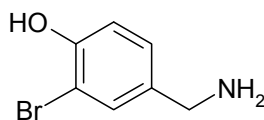

The title compound is prepared according to the procedure by Smith, L.H. *J. Med. Chem.* **1977**, *20*, 1254-1258 using 4-hydroxybenzylamine as the starting material. <sup>1</sup>H NMR

<sup>1</sup> Corresponding author. Telephone: 1-908-231-4573. E-mail: guyan.liang@sanofi-aventis.com.

(300 MHz, DMSO- $d_6$ )  $\delta$  8.0 (bs, 2H), 7.6 (m, 1H), 7.3 (m, 1H), 7.0 (m, 1H), 6.8 (m, 1H), 3.9 (m, 2H).

B. (3-Bromo-4-hydroxy-benzyl)-carbamic acid tert-butyl ester.

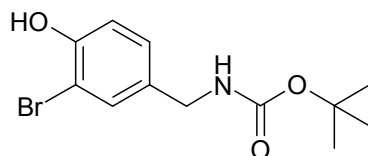

To a solution of 3-bromo-4-hydroxybenzylamine hydrobromide (18.4g, 65 mmol) in  $\text{CH}_2\text{Cl}_2$  (600 mL) is added DIEA (32 ml, 195 mmol) and Boc-anhydride (16.6 g, 78 mmol). The reaction mixture is stirred for 4 h and diluted with  $\text{CH}_2\text{Cl}_2$  (300 mL). The reaction mixture is washed with water, brine, dried over  $\text{MgSO}_4$ , filtered and concentrated *in vacuo*. The crude residue is purified by  $\text{SiO}_2$  chromatography eluting with 2% MeOH/ $\text{CH}_2\text{Cl}_2$  to yield 19 g (96%) of the titled compound.  $^1\text{H}$  NMR (300 MHz,  $\text{CDCl}_3$ )  $\delta$  7.4 (m, 1H), 7.15 (m, 1H), 7.0 (m, 1H), 6.8 (m, 1H), 5.5 (m, 1H), 4.2 (m, 2H), 1.5 (s, 9H).

C. 1-Benzyl-5'-(tert-butyloxycarbonyl-aminomethyl)-spiro[piperidine-4,3'-benzo[b]furan]

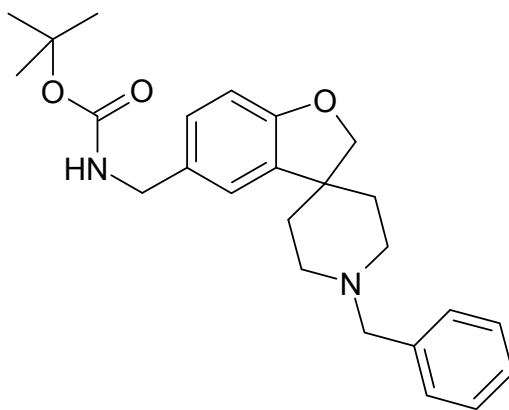

The title compound is prepared in a similar manner according to the procedure by Allerton, C. et al. PCT Int Appl., WO 2007/075775 using (1-benzyl-1,2,3,6-tetrahydropyridin-4-yl)methanol and (3-bromo-4-hydroxy-benzyl)-carbamic acid tert-butyl ester as the starting materials.  $^1\text{H}$  NMR (300 MHz,  $\text{CDCl}_3$ )  $\delta$  7.4 (m, 5H), 7.1 (m,

2H), 6.7 (m, 1H), 4.8 (bs, 1H), 4.4 (s, 2H), 4.2 (m, 2H), 3.5 (s, 2H), 2.9 (m, 2H), 2.0 (m, 4H), 1.7 (m, 2H), 1.4 (s, 9H). LCMS  $m/z$ :  $[M+H]^+=409$ .

D. 5'-(tert-butyloxycarbonyl-aminomethyl)-spiro[piperidine-4,3'-(2H)-benzo[b]furan]

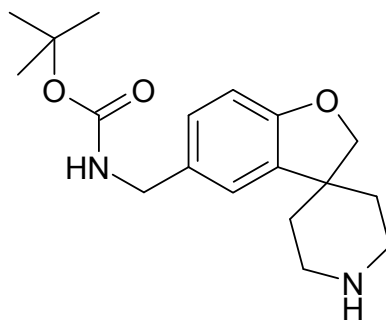

A solution of 1-Benzyl-5'-(tert-butyloxycarbonyl-aminomethyl)-spiro[piperidine-4,3'-benzo[b]furan] (6.0 g, 14.7 mmol) and 10% Pd/C (1 g) in 60 ml MeOH and acetic acid (1 ml) is subjected to  $H_2$  at 50 psi for 5h. The reaction mixture is filtered through celite and is concentrated down *in vacuo*. The reaction mixture is taken up in EtOAc and is washed with sat  $NaHCO_4$  (2X), brine, dried with  $Na_2SO_4$ , filtered and is concentrated *in vacuo* to give 4.54 g (97% yield) of the title compound.  $^1H$  NMR (300 MHz,  $CDCl_3$ )  $\delta$  7.1 (m, 2H), 6.8 (m, 1H), 4.8 (bs, 1H), 4.4 (s, 2H), 4.2 (m, 2H), 3.3 (s, 2H), 2.7 (m, 2H), 1.8 (m, 2H), 1.4 (s, 9H).

E. 7-Fluoro-1-(2-methoxy-ethyl)-1H-indole-3-carboxylic acid

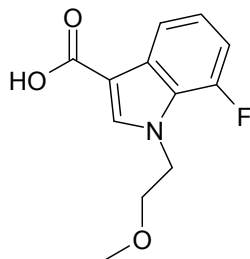

The title compound is prepared in a similar manner according to the procedure by Choi-Sledeski, Yong Mi et al. PCT Int Appl., WO 2010/022196 using 7-fluoro-1H-indole) as the starting material.  $^1H$  NMR (300 MHz,  $DMSO-d_6$ )  $\delta$  12.17 (s, 1H), 8.04 (s, 1H),

7.83 (d,  $J = 7.5$  Hz, 1H), 7.18-7.11 (m, 1H), 7.08-7.01 (m, 1H), 4.50 (t,  $J = 5.1$  Hz, 2H), 3.69 (t,  $J = 5.1$  Hz, 2H), 3.22 (s, 3H);  $^{19}\text{F}$  NMR (300 MHz, DMSO- $d_6$ )  $\delta$  -134.07 (d, 1F).

F.1-(7-Fluoro-1-(2-methoxy-ethyl)-indole-3-yl)-carbonyl-5'-(tert-butyloxycarbonyl-aminomethyl)-spiro[piperidine-4,3'-(2H)-benzo[b]furan]

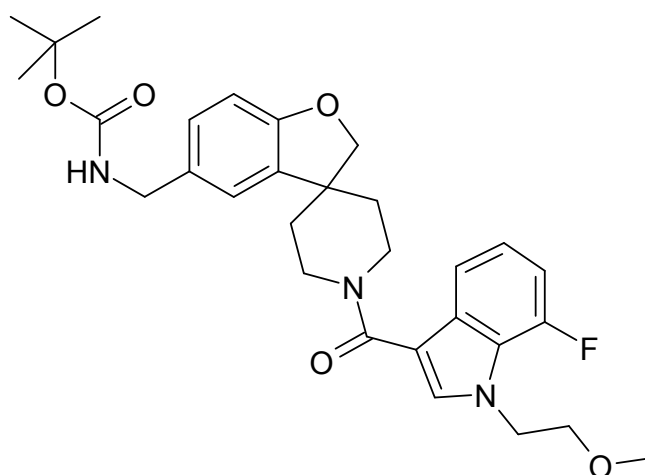

To a solution of 7-fluoro-1-(2-methoxy-ethyl)-1*H*-indole-3-carboxylic acid (474 mg, 2.0 mmol), 5'-(tert-butyloxycarbonyl-aminomethyl)-spiro[piperidine-4,3'-(2H)-benzo[b]furan] (636 mg, 2.0 mmol), 1-(3-dimethylaminopropyl)-3-ethylcarbodiimide hydrochloride (460 mg, 2.4 mmol) in  $\text{CH}_2\text{Cl}_2$  is added triethylamine (0.56 ml, 4.0 mmol). The resulting mixture is stirred at room temperature overnight. The mixture is diluted with EtOAc and washed with water, brine, dried over  $\text{MgSO}_4$ , filtered and concentrated *in vacuo*. Purification by flash chromatography on  $\text{SiO}_2$  gives the titled compound.  $^1\text{H}$  NMR (300 MHz,  $\text{CDCl}_3$ )  $\delta$  7.5 (m, 2H), 7.1 (m, 3H), 6.9 (m, 1H), 6.75 (d, 1H), 4.8 (bs, 1H), 4.5 (m, 4H), 4.4 (m, 2H), 4.3 (m, 2H), 3.8 (t, 2H), 3.3 (s, 3H), 3.2 (m, 2H), 1.9 (m, 2H), 1.8 (m, 2H), 1.4 (s, 9H). LCMS  $m/z$ :  $[\text{M}+\text{H}]^+ = 538$ .

G. 1-(7-Fluoro-1-(2-methoxy-ethyl)-indole-3-yl)-carbonyl-5'-aminomethyl-spiro[piperidine-4,3'-(2H)-benzo[b]furan] hydrochloride

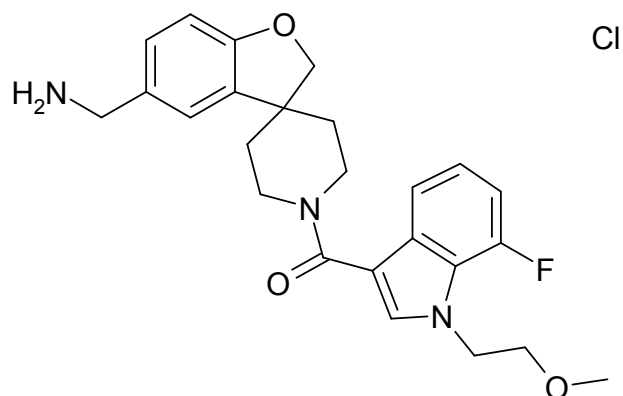

To a solution of 1-(7-fluoro-1-(2-methoxy-ethyl)-indole-3-yl)-carbonyl-5'-(tert-butylloxycarbonyl-aminomethyl)-spiro[piperidine-4,3'-(2H)-benzo[b]furan] (371 mg, 0.69 mmol) in dioxane (5 mL) is added 2M HCl in dioxane (10 mL, 20.0 mmol). The reaction mixture is stirred for 2h then concentrated *in vacuo*. The residue is triturated with ether for 2h and the resulting solid collected to give the titled compound..  $^1\text{H NMR}$  (300 MHz,  $\text{DMSO-}d_6$ )  $\delta$  8.2 (bs, 2H), 7.8 (s, 1H), 7.5 (m, 2H), 7.4 (m, 2H), 7.2 (m, 1H), 6.8 (d, 1H), 4.5 (m, 4H), 4.2 (m, 2H), 3.9 (m, 2H), 3.7 (m, 2H), 3.3 (m, 2H), 3.2 (s, 3H), 1.83 (m, 4H). LCMS  $m/z$ :  $[\text{M}+\text{H}]^+=438$ . Purity = 97.93%.

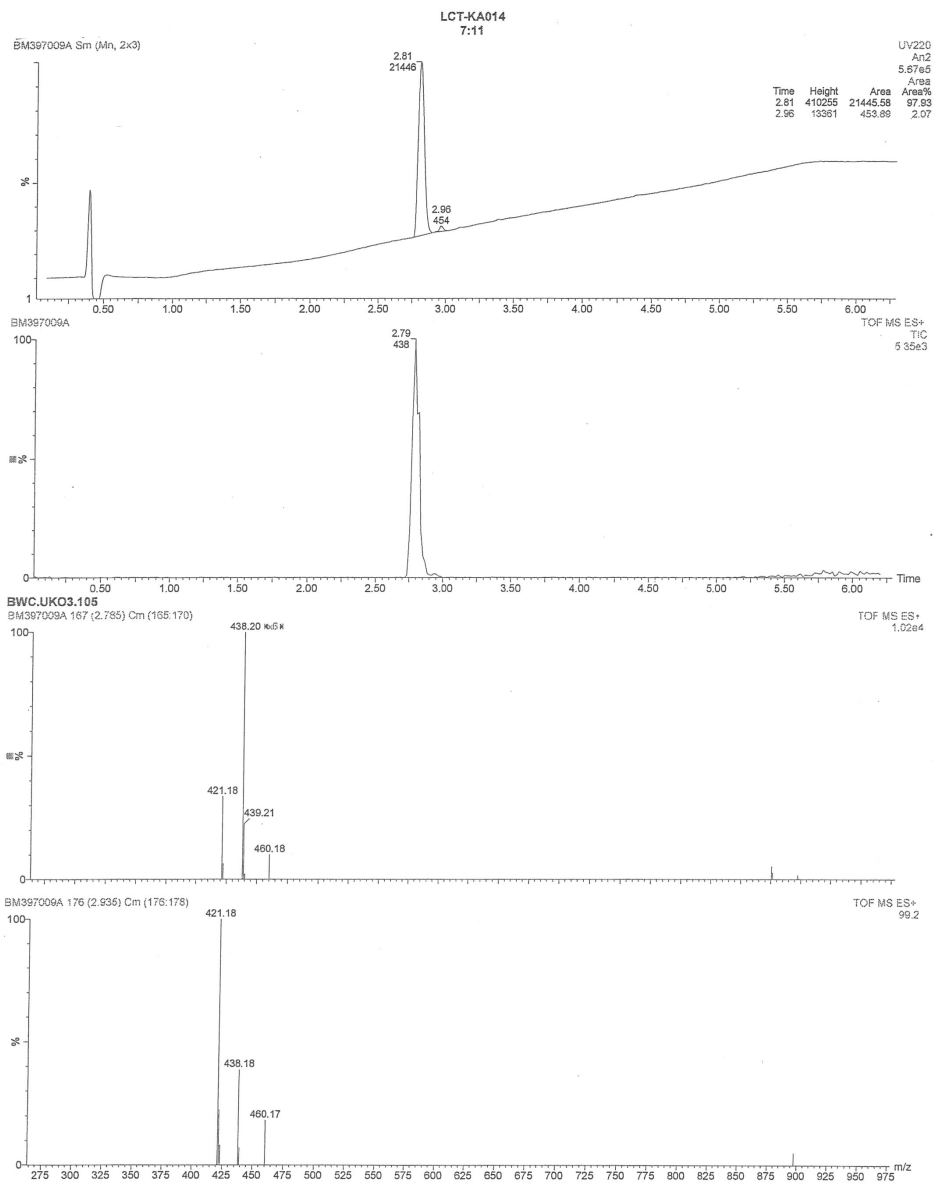

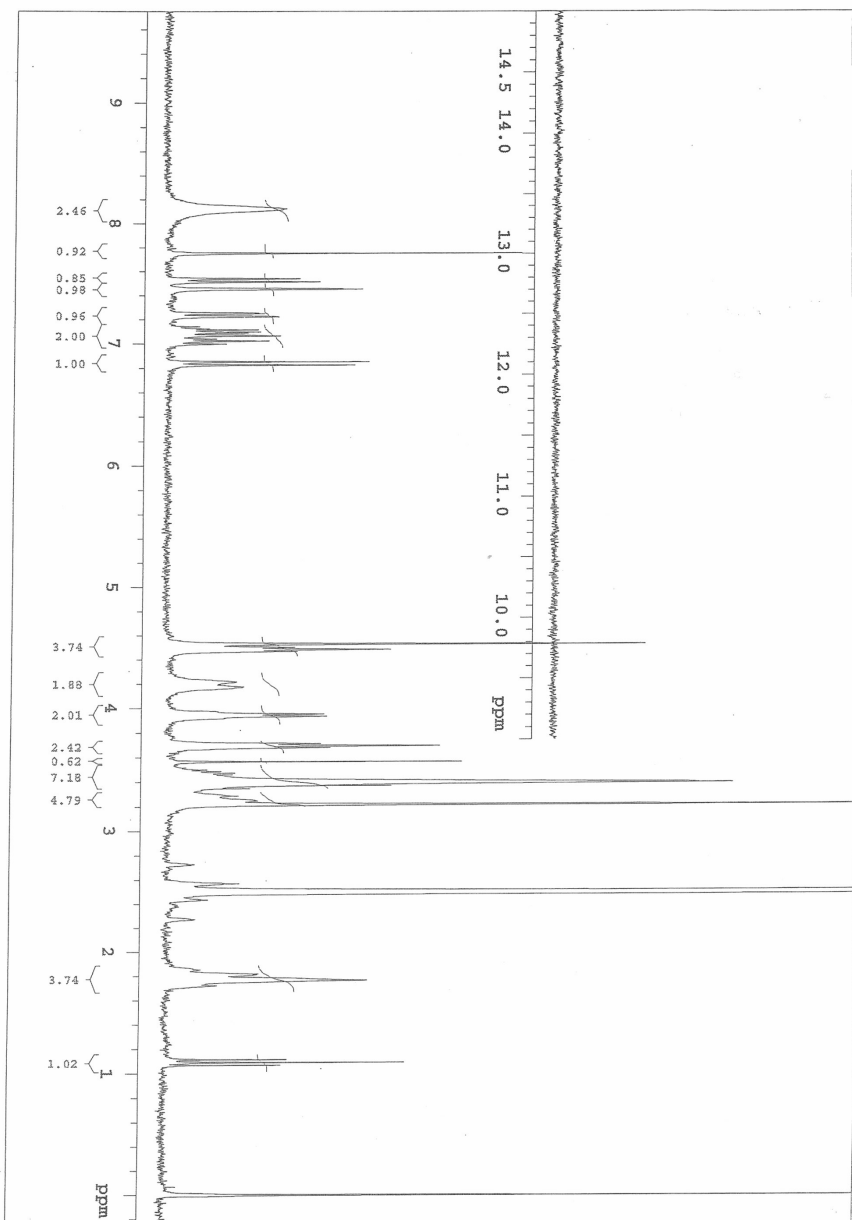

Supplement: c1md00104c.pdf [file c1md00104c.pdf]
